# Supplementary material
Source: publisher figshare collection journal article supplement (https://springernature.figshare.com/ndownloader/files/18512111)
Supplement: Supplementary file [file 18512111]

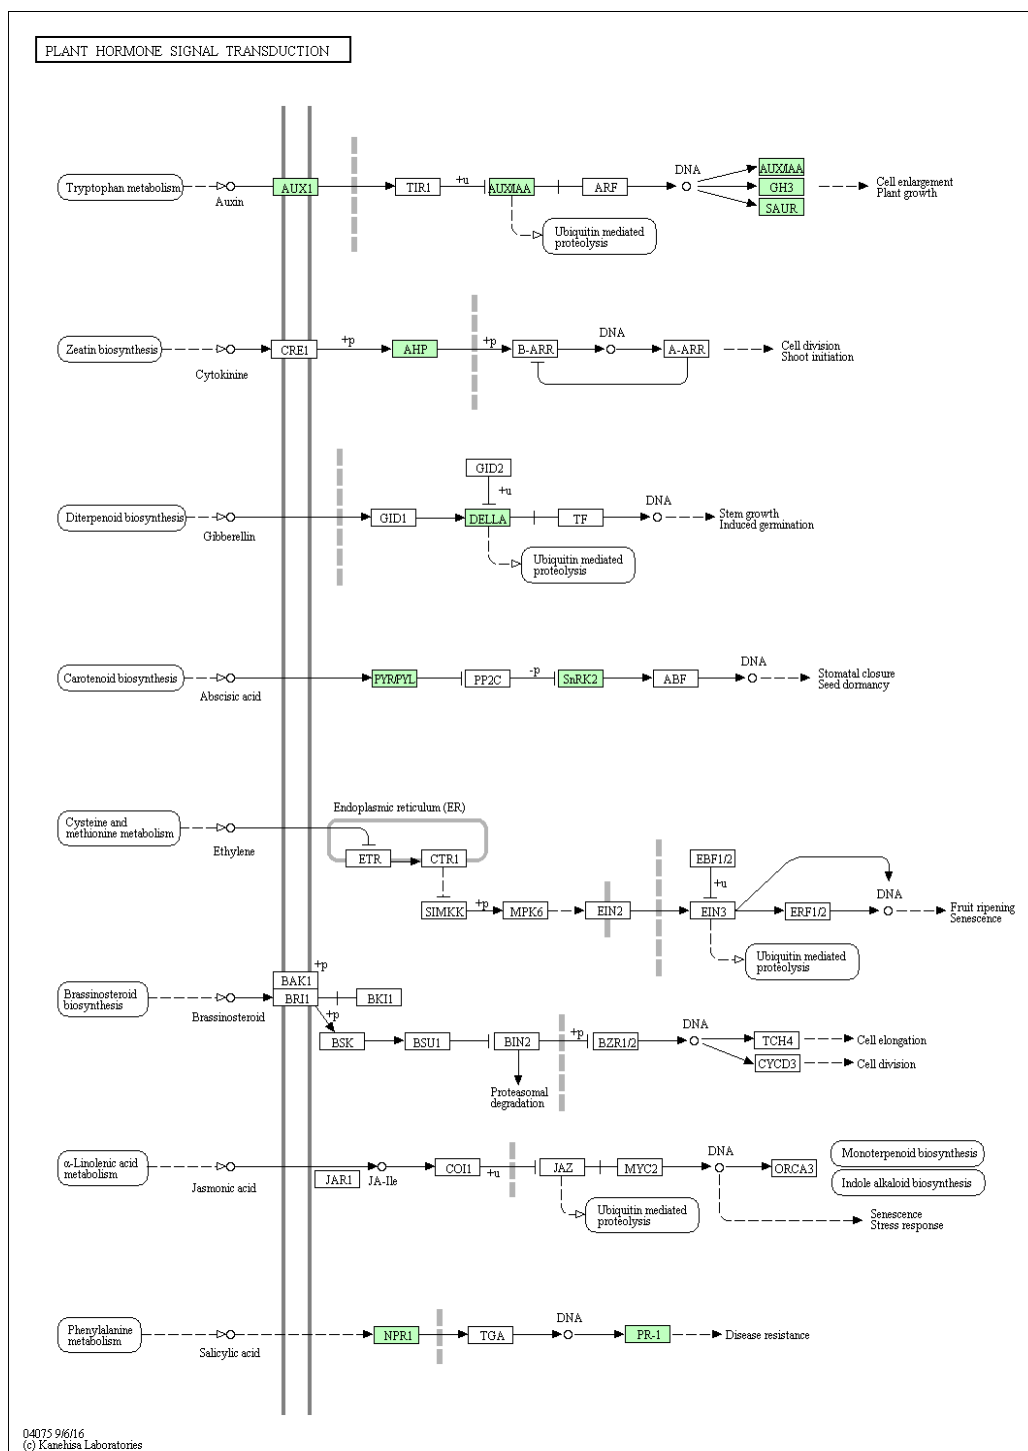

Figure S6 KEGG pathway map of plant hormone signal transduction for upregulated genes in rhizobia-inoculated control roots.
